# Supplementary material for: Assessing the electrical activity of individual ZnO nanowires thermally annealed in air
Source: Royal Society of Chemistry journal article supplement (doi:10.1039/d1na00860a), 2022-01-01
Supplement: d1na00860a1.pdf [file d1na00860a1.pdf]

## Assessing the electrical activity of individual ZnO nanowires thermally annealed in air

Micka Bah<sup>1\*</sup>, Taoufik Slimani Tlemcani<sup>1\*</sup>, Sarah Boubenia<sup>1</sup>, Camille Justeau<sup>1</sup>, Nicolas Vivet<sup>2</sup>, Jean-Michel Chauveau<sup>3,4</sup>, François Jomard<sup>4</sup>, Kevin Nadaud<sup>1</sup>, Guylaine Poulin-Vittrant<sup>1</sup> and Daniel Alquier<sup>1\*</sup>

<sup>1</sup>GREMAN UMR 7347, Université de Tours, CNRS, INSA Centre Val de Loire, 37071 TOURS, France

<sup>2</sup>STMICROELECTRONICS TOURS., 10 rue Thalès de Milet, 37100 Tours, France

<sup>3</sup>Université Côte d'azur, CNRS, CRHEA, Rue B. Gregory, F-06560 Valbonne, France

<sup>4</sup>Université Paris-Saclay, Université Versailles-Saint-Quentin, CNRS, GEMAC, 78035 Versailles, France

**Corresponding authors:** [micka.bah@univ-tours.fr](mailto:micka.bah@univ-tours.fr), [taoufik.slimani@univ-tours.fr](mailto:taoufik.slimani@univ-tours.fr), [daniel.alquier@univ-tours.fr](mailto:daniel.alquier@univ-tours.fr)

**Table 1** | Chemical and physical parameters used for the ZnO NW arrays synthesis. The different annealing temperatures employed for the SCM studies are also added to the table.

| Batch                      |          | Reactants                                                                                       | Growth duration | Autoclave temperature | Annealing temperature/time |
|----------------------------|----------|-------------------------------------------------------------------------------------------------|-----------------|-----------------------|----------------------------|
| Without NH <sub>4</sub> OH | Sample A | • Zinc nitrate hexahydrate Zn(NO <sub>3</sub> ) <sub>2</sub><br>• Hexamethylenetetramine (HMTA) | 15h             | 85°C                  | RT                         |
|                            | Sample B |                                                                                                 |                 |                       | 350°C/1.5h                 |
|                            | Sample C |                                                                                                 |                 |                       | 350°C/15h                  |
|                            | Sample D |                                                                                                 |                 |                       | 450°C/15h                  |
| With NH <sub>4</sub> OH    | Sample E | • Zinc nitrate hexahydrate Zn(NO <sub>3</sub> ) <sub>2</sub><br>• Hexamethylenetetramine (HMTA) | 15h             | 85°C                  | 350°C/15h                  |
|                            | Sample F | • Ammonium hydroxide NH <sub>4</sub> OH (29%)                                                   |                 |                       | 450°C/15h                  |

ZnO NWs grown by hydrothermal method lead to pure phase material. The samples present the main diffraction peak of hexagonal wurtzite ZnO structure (peak at  $34.4^\circ$  corresponding to the lattice plane (0002) of wurtzite ZnO structure) attesting that the NWs grew predominantly along the [0001] direction.

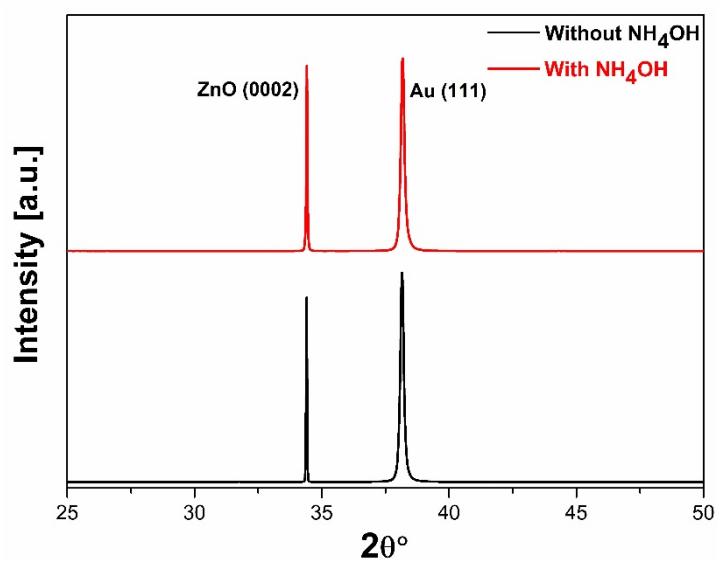

**Figure S1** | XRD spectra of the ZnO NWs deposited with and without NH<sub>4</sub>OH.

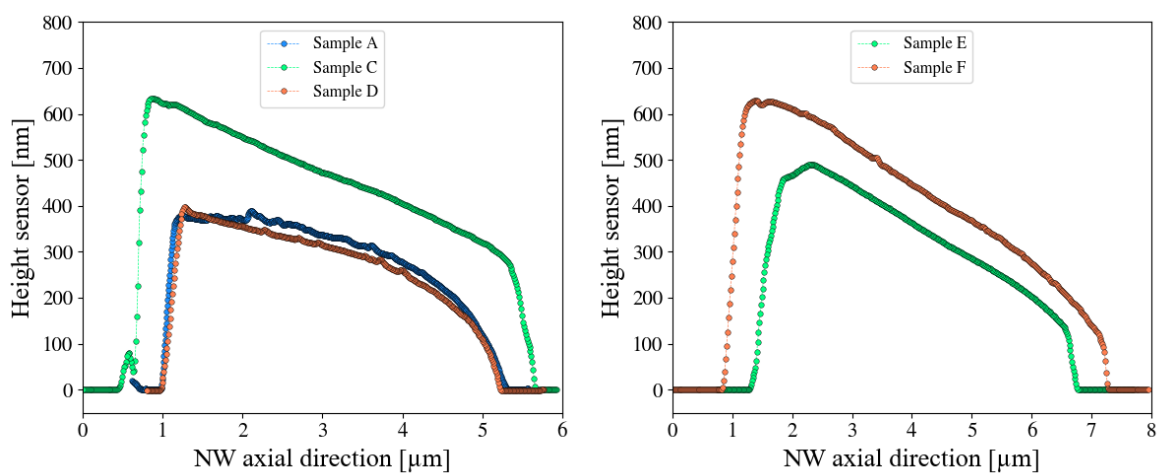

**Figure S2** | Topographic profile of the different ZnO NWs.

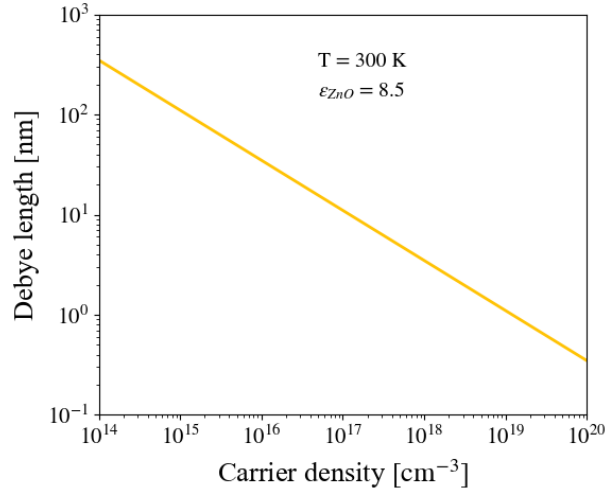

**Figure S3** | Extrinsic Debye length as a function of carrier density for ZnO ( $\epsilon_{\text{ZnO}} = 8.5$ ) at room temperature. The carrier density  $n$  is related to the Debye length  $\lambda = [(k_B \times T \times \epsilon) / (q \times n)]^{1/2}$  (where  $k_B$ : is the Boltzmann constant,  $T$ : the temperature,  $\epsilon$ : the permittivity of the semiconductor and  $q$ : the elementary charge). Lower carrier concentration will lead to a large depletion region and poor spatial resolution of the SCM technique.

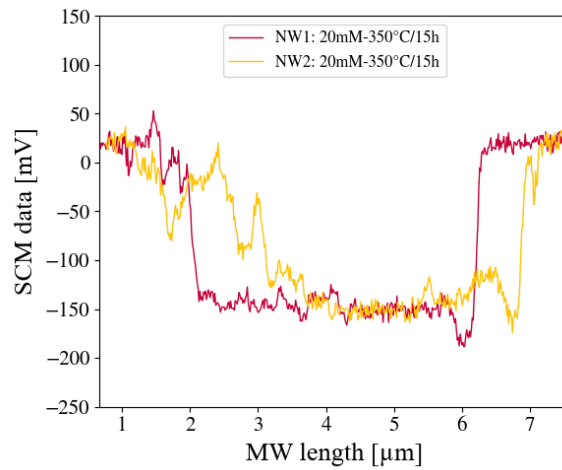

**Figure S4** | SCM signals along axial direction of two ZnO NWs grown with 20mM of  $\text{NH}_4\text{OH}$  and annealed at  $350^\circ\text{C}/15\text{h}$ .

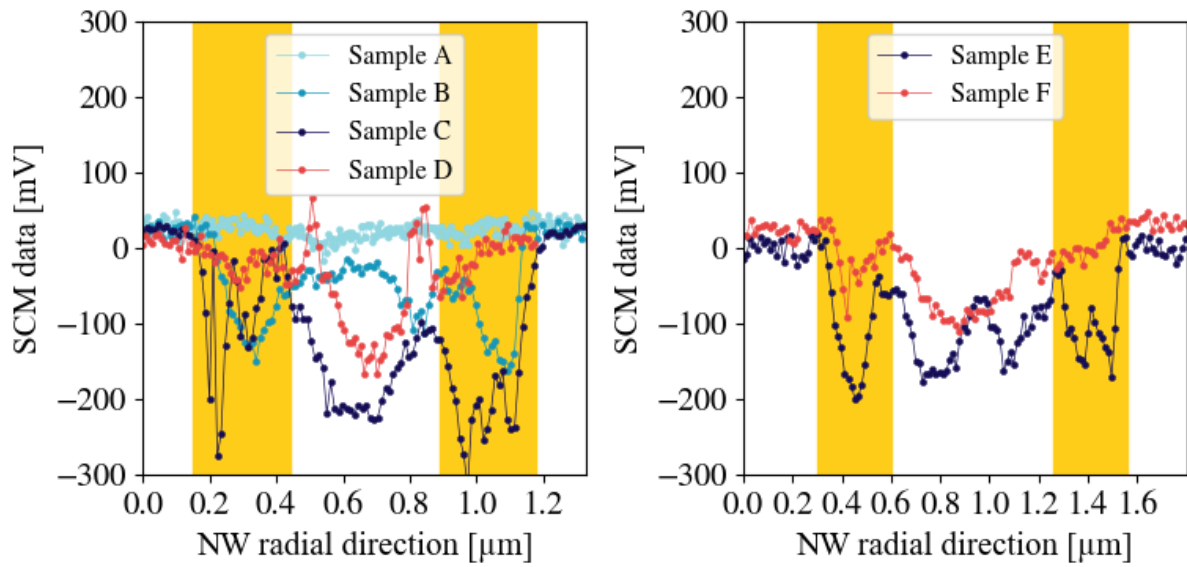

**Figure S5** | SCM data evolution along the radial direction of ZnO NWs. The different profiles are extracted at the middle of the NW in the axial direction. The signals inside the yellow bands correspond to the side facets.
